# Supplementary material for: Pattern of Pharmacological Habits among Medical Students – a cross sectional study
Source: Research Square preprint supplement (doi:10.21203/rs.3.rs-7489117/v1), 2025-11-10
Supplement: Supplementary file 1 [file c912c3e54b7ecf1f16a4c1b6.docx]

# Supplementary File 1 – English version of the questionnaire developed for this study

# Study on the Pattern of Pharmacological Habits of Medical Students at UC

As a medical student at the Faculty of Medicine of the University of Coimbra, you are invited to participate in this study.
Within the scope of a research project that involves members of the Faculty of Medicine of the University of Coimbra (FMUC) and the Coimbra Hospital and University Centre (CHUC), we propose that you answer this brief questionnaire.

This study aims to characterize the pattern of medication use among FMUC students, providing better knowledge about your health, as well as contributing to the development of programs that promote the rational use of medicines.

This is an observational, cross-sectional study that was approved by the Ethics Committee of FMUC, in order to ensure the protection of the rights, safety and well-being of all participants, and to provide public evidence of such protection.

Your participation is voluntary and you are free to refuse, without any risk. You may withdraw your consent at any time by notifying the investigator, without penalty or loss of benefits, and without affecting your relationship with the investigators who invited you to participate in this study.

Your records will remain confidential and anonymized in accordance with applicable regulations and laws. The research team will have access to your personal data but is bound by professional confidentiality. If this study results in a publication, confidentiality of participants’ identities will be guaranteed.

The information you have just read is intended to clarify the nature, scope, consequences, and risks of the study, so that after being duly informed, you can decide whether or not to participate.

If you are interested in participating, please read all questions carefully and answer according to the instructions. The questionnaire consists of 40 questions and takes approximately 15 minutes to complete.

We thank you in advance for your participation!

Declaration of informed consent
I declare that I have received information regarding the circumstances of my participation in this research project. I have carefully read and understood the information of the Informed Consent. I agree with the conditions and understand that participation in this study is voluntary and confidential, and that the data collected will be analyzed solely for research purposes.

Do I wish to proceed with the study?
Yes ___
No ___

## Demographic Data

1. Age: ______ Years

2. Sex: Male ___ Female ___

3. Year of the Integrated Master’s Degree in Medicine (MIM): ____ year

4. Weight: _____ Kg

5. Height: _____ cm

6. Occupational status: Full-time student ___; Working student ___

7. Marital status: Single ___; Married ___; Other ___

8. Are you currently in a romantic relationship? Yes ___ No ___

9. Sexual orientation: Heterosexual ___; Lesbian ___; Gay ___; Bisexual ___; Transgender ___; Other ___

10. Do you have children? 0 ___; 1 ___; 2 ___; ≥3 ___

11. Place of origin: North ___; Centre ___; Lisbon and Tagus Valley ___; Alentejo ___; Algarve ___; Islands ___; PALOP ___; Other, which? __________

12. Does your household reside in Coimbra? Yes ___ No ___

13. Do you live with your household during the academic year? Yes ___ No ___

14. If you answered Yes, proceed to question 15. If you answered No: How often do you visit your household for family gatherings? Every weekend ___; 1–2 times per month ___; 1–2 times per semester ___; Only during holidays ___

15. Is any family member a healthcare professional? Yes ___ No ___

## Self-Assessment

16. Self-assessment of your health status: Excellent/Very good ___; Good ___; Fair ___; Poor ___

17. Self-assessment of your physical condition: Excellent/Very good ___; Good ___; Fair ___; Poor ___

18. Self-assessment of daily stress level: High ___; Moderate ___; Low ___

## Use of Healthcare Services

19. Number of medical consultations you attended in 2022: None ___; 1 ___; 2–4 ___; >4 ___

20. Have you taken any medication in the past year? Yes ___ No ___

21. If you answered No, proceed to question 26. If you answered Yes, continue: In the past year, have you engaged in self-medication? Never ___; Rarely ___; At least once per month ___; Almost every week ___

22. How many prescribed medications do you take? None ___; 1–2 ___; 3–4 ___; 5 or more ___

23. For how long have these medications been prescribed? <1 year ___; 1–2 years ___; ≥3 years ___

24. Which pharmacotherapeutic classes? Antibiotics ___; Antiallergics ___; Antipyretics ___; Analgesics ___; Anti-inflammatories ___; Corticosteroids ___; Antiasthmatics ___; Antihypertensives ___; Antiarrhythmics ___; Anticonvulsants ___; Antipsychotics ___; Anxiolytics/Hypnotics ___; Antidepressants ___; Antacids ___; Antidiabetics ___; Antiemetics ___; Laxatives ___; Antidiarrheals ___; Other, which? __________

25. For which pathology(ies) are you prescribed medication? Infectious diseases ___; Hematological diseases ___; Endocrine, nutritional and metabolic disorders ___; Anxiety/Depression ___; Nervous system diseases ___; Eye and adnexa diseases ___; Ear diseases ___; Cardiovascular diseases ___; Respiratory diseases ___; Gastrointestinal diseases ___; Dermatological diseases ___; Musculoskeletal disorders ___; Genitourinary diseases ___; Other, which? __________

## Consumption Habits

26. Do you consume alcohol? Yes ___ No ___

27. Do you drink coffee? Yes ___ No ___

28. Do you smoke? Yes ___; No ___; Occasionally ___

29. If yes, how many cigarettes per day? ______ Since when? ___ days / ___ months / ___ years

30. For how long have you been smoking? <1 year ___; 1–2 years ___; ≥3 years ___

31. Do you use: Cannabis ___; Ecstasy ___; Cocaine ___; Heroin ___; Other, which? __________

32. Frequency of use: Several times per day ___; Daily ___; 1–2 times per week ___; Occasionally ___

33. For how many years have you had these consumption habits? <1 year ___; 1–2 years ___; ≥3 years ___

## Sleep Habits

34. On average, how many hours do you sleep per night? ______ hours

35. How many hours do you sleep per night during exam periods? ______ hours

36. Do you consider that you sleep enough? Yes ___ No ___

## Physical Exercise

37. Do you practice physical exercise? Yes ___ No ___

38. If No, proceed to question 39. If Yes: On average, how many hours per week? <2 hours ___; 2–6 hours ___; >6 hours ___

## COVID-19 Pandemic

39. Do you think the COVID-19 pandemic has influenced your medication and consumption habits? Yes ___; No ___; Not applicable ___

40. Since the COVID-19 pandemic, have you started taking any medication from the following pharmacotherapeutic classes? Antibiotics ___; Antiallergics ___; Antipyretics ___; Analgesics ___; Anti-inflammatories ___; Corticosteroids ___; Antiasthmatics ___; Antihypertensives ___; Antiarrhythmics ___; Anticonvulsants ___; Antipsychotics ___; Anxiolytics/Hypnotics ___; Antidepressants ___; Antacids ___; Antidiabetics ___; Antiemetics ___; Laxatives ___; Antidiarrheals ___; Other, which? __________
